# Supplementary material for: Weighted K-means support vector machine for cancer prediction
Source: PubMed Central journal article supplement (PMC4960100; doi:10.1186/s40064-016-2677-4), 2016-07-25
Supplement: 40064_2016_2677_MOESM1_ESM.pdf [file 40064_2016_2677_MOESM1_ESM.pdf]

Supplementary material: Weighted  $K$ -means Support  
Vector Machine for Cancer Prediction

SungHwan Kim<sup>1</sup>

<sup>1</sup> Department of Statistics, Korea University, Seoul, South Korea

December 21, 2015

# 1 Numerical verification for the weighted support vector machine

## 1.1 Proof for Lemma 1

$\xi_n^*$  satisfies below conditions

$$\xi_n^* \geq 0 \text{ and } \xi_n^* \geq c_n[1 - y_n h(x_n; \beta)]_+ \text{ for } n = 1, \dots, N.$$

Let's take any  $\xi$  satisfying (3.5) conditions. Then,

$$\xi_n^* \geq c_n[1 - y_n h(x_n; \beta)]_+ = \xi_n^*$$

Hence, Lemma 1 is proved as below:

$$\begin{aligned} Q(\beta, \xi^*) &= \frac{1}{2} \|w\|^2 + C \sum_{n=1}^N \xi_n^* \\ &\leq \frac{1}{2} \|w\|^2 + C \sum_{n=1}^N \xi_n \\ &= Q(\beta, \xi). \end{aligned}$$

## 1.2 Proof for Lemma 2

It is clear that

$$\beta^* = \operatorname{argmin}_{\beta} Q(\beta, \xi^*) = \operatorname{argmin}_{\beta} R(\beta).$$

## 1.3 Proof for the solution to the wSVM.

In order to solve non-separable case, one introduce slack variables,

$$\xi_n \geq 0 \text{ for } n = 1, \dots, N \tag{1}$$

and use relaxed separability constraints with a weighted term  $c_n$

$$\xi_n \geq c_n(1 - y_n(\langle w, x_n \rangle + b)) \tag{2}$$

$$\Leftrightarrow c_n y_n(\langle w, x_n \rangle + b) \geq c_n - \xi_n \text{ for } n = 1, \dots, N. \tag{3}$$

SVM uses the quadratic programming (QP) to solve, for some  $C > 0$ ,

$$\min_{w,b,\xi} \frac{1}{2} \|w\|^2 + C \sum_{n=1}^N \xi_n, \quad (4)$$

subject to the constraints (1) and (2).

Consider the Lagrangian

$$L(w, b, \xi, \alpha, r) = \frac{1}{2} \|w\|^2 + C \sum_{n=1}^N \xi_n - \sum_{n=1}^N \alpha \{c_n y_n (\langle w, x_n \rangle + b) - c_n + \xi_n\} - \sum_{n=1}^N r_n \xi_n. \quad (5)$$

From

$$\begin{aligned} \frac{\partial L}{\partial w} &= w - \sum_{n=1}^N \alpha_n c_n y_n x_n = 0 \\ \frac{\partial L}{\partial \xi_n} &= C - \alpha - r_n = 0 \\ \frac{\partial L}{\partial b} &= \sum_{n=1}^N \alpha_n c_n y_n = 0, \end{aligned}$$

we have

$$w^* = \sum_{n=1}^N \alpha_n c_n y_n x_n. \quad (6)$$

Since  $0 < r_n = C - \alpha_n$ , we have  $\alpha_n < C$ . Note that

$$\begin{aligned} \langle w^*, w^* \rangle &= \sum_{n=1}^N \sum_{m=1}^N \alpha_n c_n y_n \alpha_m c_m y_m \langle x_m, x_n \rangle \\ \langle w^*, x_n \rangle &= \sum_{m=1}^N \alpha_m c_m y_m \langle x_m, x_n \rangle. \end{aligned}$$

Hence,

$$\begin{aligned}
g(\alpha, r) &= L(w^*, b^*, \xi^*, \alpha, r) \\
&= \frac{1}{2} \|w^*\|^2 + C \sum_{n=1}^N \xi_n^* - \sum_{n=1}^N \alpha \{c_n y_n (\langle w^*, x_n \rangle + b^*) - c_n + \xi_n^*\} - \sum_{n=1}^N r_n \xi_n^* \\
&= \frac{1}{2} \|w^*\|^2 - \sum_{n=1}^N \alpha_n \{c_n y_n (\langle w^*, x_n \rangle + b^*) - c_n\} + \sum_{n=1}^N (C - \alpha_n - r_n) \xi_n^* \\
&= \frac{1}{2} \|w^*\|^2 - \sum_{n=1}^N \alpha_n \{c_n y_n (\langle w^*, x_n \rangle + b^*) - c_n\} \\
&= \frac{1}{2} \|w^*\|^2 - \sum_{n=1}^N \alpha_n c_n y_n \langle w^*, x_n \rangle - b^* \sum_{n=1}^N \alpha_n c_n y_n + \sum_{n=1}^N \alpha_n c_n \\
&= \frac{1}{2} \sum_{n=1}^N \sum_{m=1}^N \alpha_n c_n y_n \alpha_m c_m y_m \langle x_m, x_n \rangle \\
&\quad - \sum_{n=1}^N \alpha_n c_n y_n \left( \sum_{m=1}^N \alpha_m c_m y_m \langle x_m, x_n \rangle \right) - b^* \sum_{n=1}^N \alpha_n c_n y_n + \sum_{n=1}^N \alpha_n c_n \\
&= -\frac{1}{2} \sum_{n=1}^N \sum_{m=1}^N \alpha_n c_n y_n \alpha_m c_m y_m \langle x_m, x_n \rangle - b^* \times 0 + \sum_{n=1}^N \alpha_n c_n \\
&= W(\alpha).
\end{aligned}$$
